1 **Comparison between three concentration techniques for**  
2 **diagnosing intestinal parasites**

3

4 **AUTHORS:** Sonia Trabelsi<sup>1,#</sup>, Majdi Hanachi<sup>1</sup>, Sarra Cheikhrouhou<sup>1</sup>, Dorsaf Aloui<sup>1</sup>,  
5 Meriam Bouchekoua<sup>1</sup>, Samira Khaled<sup>1</sup>

6 <sup>1</sup>Parasitology and Mycology Department, Charles Nicolle University Hospital, Tunis,  
7 Tunisia

8 #Corresponding author: [trabelsi.sonia@gmail.com](mailto:trabelsi.sonia@gmail.com)

9 **KEYWORDS:** Parasitic intestinal diseases, Diagnostic techniques and procedures,  
10 Sensitivity

11

12

13

14

15

16

17

18

19

20 **ABSTRACT**

21 **Background:** Intestinal parasitoses still are a noticeable threat to public health. The  
22 direct diagnosis of such parasites requires the use of concentration techniques, whose  
23 sensitivities for protozoan cysts and helminth eggs are far from equal.

24 **Aim:** To compare the Willis, Ritchie and Bailenger concentration techniques in terms of  
25 parasite recovery, cost, time, and biosafety.

26 **Methods:** This prospective study analysed 236 stool specimens for intestinal parasites  
27 using the direct wet smear and the above-mentioned concentration techniques applied  
28 separately.

29 **Results:** Biphasic techniques identified significantly more positive specimens for  
30 intestinal parasites than the Willis technique, the latter leading to less concentrated and  
31 more altered parasitic elements on microscopy. No statistically significant difference  
32 emerged from comparing Ritchie's and Bailenger's methods. The Willis technique was  
33 the safest, yet the costliest and the most time-consuming of the studied methods.

34 **Conclusions:** Even though the hazardous reagents employed may raise legitimate  
35 concerns over their health implications, biphasic techniques prove to be uncostly, quick  
36 to perform, and highly sensitive for detecting faecal parasites, therefore ensuring a safe  
37 diagnosis for routine stool examinations.

38

39

40

## 41 **INTRODUCTION**

42 Human intestines and biliary ducts can host a wide range of saprophytic and  
43 parasitic organisms. Some of the latter may turn out to be pathogenic, causing intestinal  
44 parasitoses. The main mode of transmission of such diseases is the faecal-oral route.  
45 Despite the significant improvement in terms of hygienic conditions and the subsequent  
46 decrease in their incidence, these pathologies should not be relegated to the  
47 background. In fact, they still constitute a major public health problem in many  
48 developing countries, leading to a noticeable morbimortality and a negative impact on  
49 their economy (1).

50 Since symptoms are not specific, the diagnosis of intestinal parasitoses cannot be  
51 established clinically and needs to be confirmed by further tests. In this regard, the  
52 laboratory plays a crucial role in diagnosing parasitic intestinal infections, mostly through  
53 a parasitological stool examination. This test must include a direct wet smear and a  
54 direct microscopic examination after performing a concentration technique (2), as  
55 decreed by the Tunisian ministry of public health in the nomenclature of clinical  
56 pathology acts.

57 Several stool concentration methods were developed throughout the years, applying  
58 different chemical and physical principles. Biphasic techniques, combining the action of  
59 chemical reagents with a physical process, appear to be the most widely used  
60 nowadays, especially resource-poor countries (3). No technique can guarantee the  
61 recovery of all parasites present in a faecal sample, each method being characterized by

62 its advantages and its limits. To deal with this issue in the absence of standardisation,  
63 some laboratories resort to the use of two complementary methods in order to optimize  
64 their results. Other criteria are to be taken into account when evaluating a concentration  
65 technique, such as its cost and the toxicity of the reagents it employs. These criteria are  
66 critical in the context of developing countries, which happen to be the most affected by  
67 intestinal parasitoses, as concentration techniques must ally efficiency and affordability  
68 without violating the biosafety standards.

69 The aim of the present study was to compare between three parasite concentration  
70 techniques, namely the Willis, Ritchie and Bailenger methods, based on sensitivity, time  
71 of realisation, cost, and biosafety.

72

## 73 **MATERIALS AND METHODS**

### 74 **Stool examination procedure**

75 This prospective study encompassed 236 faecal specimens coming from outpatients,  
76 inpatients, or non-permanent resident students in Tunisia.

77 A direct wet smear was performed by spreading a small amount of the sample with  
78 a drop of physiological serum before applying a coverslip. The whole smear thus  
79 obtained was examined with the low-power objective (10x), while the high-power  
80 objective (40x) was used to observe selected fields (2). The evaluated concentration

81 techniques were then performed on separate samples of each faecal specimen as  
82 detailed below.

83 *Willis concentration technique*

84 Two grams of stool were diluted in 20 millilitres of sodium chlorate. The dilution was  
85 homogenised. The solution was strained through. The obtained suspension was poured  
86 into a tube until its superior limit (a mild bombing of the liquid above the border). A  
87 coverslip was then delicately applied on top of the tube while avoiding air bubbles. A  
88 quarter of an hour later, the coverslip was removed and deposited on a microscope slide  
89 (4).

90 *Ritchie concentration technique*

91 The stool sample was diluted in 10% formalin in water. The mixture was strained  
92 through two layers of gauze into a conical 30-ml centrifuge tube until 30 ml. The tube  
93 was centrifuged for 2 minutes at 1500 revolutions per minute (rpm). The supernatant  
94 fluid was decanted and discarded. The remaining faecal sediment was thoroughly mixed  
95 with 10% formalin. The tube was filled with 10% formalin until 20 ml, then with diethyl  
96 ether until 30 ml. The tube was stoppered and vigorously shaken for homogenisation. A  
97 second centrifugation was performed with the same parameters. Four layers were  
98 obtained: a top layer of ether, a debris plug layer, a formal saline layer and a sediment  
99 layer in the bottom of the tube. The upper layers were eliminated by quickly inverting  
100 the tube. Two drops of the remaining sediment were deposited on a microscope slide

101 with a Pasteur pipette. A coverslip was added before examining the slide with a  
102 microscope (5).

### 103 *Bailenger concentration technique*

104 Two point five grams of the stool sample were diluted in 25 ml of aceto-acetic  
105 buffer. The mixture was then sieved using a gauze and collected in a conical tube until  
106 reaching a volume of 20 ml. The same volume of ether is added before strenuously  
107 shaking the mixture. After centrifuging the tube for one minute at 1500 rpm and  
108 decanting the supernatant, a few drops of the sediment were deposited on a  
109 microscope slide and overlaid with a coverslip for microscopic examination (6).

### 110 **Statistical analysis**

111 We compared the concentration techniques' performances in identifying faecal  
112 parasites using McNemar test for paired samples. The Statistical Package for the Social  
113 Sciences (SPSS) version 22.0 software was used to calculate all the parameters.  
114 Differences were considered statistically significant if  $P$  values were  $< 0.05$  and highly  
115 significant if  $P$  values were  $< 0.001$ .

116

## 117 **RESULTS**

118 Of the 236 faecal specimens included in our study, intestinal parasites were detected  
119 by the direct wet smear and/or the microscopic examination after concentration in 79  
120 samples, which means a global prevalence of 33.47%. Parasites were detected by the

121 direct wet smear in 88.6% of the positive specimens, while only 57% of the latter were  
122 identified thanks to the concentration methods employed (table 1). *Blastocystis sp.* and  
123 *Dientamoeba fragilis* were detected almost only using the direct wet smear. Protozoan  
124 cysts and helminth ova were mainly identified after performing a concentration  
125 technique (table 2).

## 126 **Comparison of parasite recovery**

127 Intestinal parasites were detected in 11 samples (14.1% of positive specimens)  
128 using the Willis flotation technique, while Bailenger's and Ritchie's biphasic methods  
129 were able to identify protozoan cysts and/or helminth ova in 42 (53.84%) and 44  
130 (56.41%) samples respectively. Table 3 compares the Willis technique to the biphasic  
131 ones. The latter are in turn compared in table 4. The number of positive samples per  
132 parasitic species according to each concentration technique is presented in table 5.

133 By applying the McNemar test for paired samples, the following results were  
134 obtained: Willis versus biphasic techniques ( $P < 0,001$ ): the difference is statistically  
135 highly significant; Bailenger versus Ritchie ( $P = 0.5$ ): the difference is not statistically  
136 significant.

137 Other microscopic parameters were analysed, such as the abundance of parasitic  
138 elements on microscopy (table 6) as well as the degree of conservation of their  
139 morphology (table 7). It thus appears that the flotation technique not only fails to

140 recover as much parasites as the biphasic techniques, but also alters the eggs' shell. In  
141 our study, Ritchie's method recovered more protozoan cysts than Bailenger's.

### 142 **Comparison of cost**

143 Table 8 exposes the cost of each technique by calculating the price in the Tunisian  
144 market as of November 2017 of all the material needed to concentrate the 236 samples  
145 included in the study. While Ritchie's method is the cheapest, closely tailed by Willis'  
146 flotation procedure, the Bailenger technique's expensiveness can be explained by the  
147 use of larger measuring tubes and a greater quantity of ether.

### 148 **Comparison of time**

149 As shown by table 9, which compares the required time to perform each of the  
150 studied techniques, Bailenger's method is the fastest to perform, while the Willis  
151 concentration technique requires more than twice as much time than the former  
152 technique.

153

## 154 **DISCUSSION**

155 The aim of this study was to compare three concentration techniques not only in  
156 terms of parasite recovery, but also according to practical criteria such as cost,  
157 processing time, and biosafety. We thus evaluated a flotation method, the Willis  
158 technique, and two biphasic methods, the Ritchie and the Bailenger techniques. This



159 choice was motivated by the fact that these concentration methods are the most  
160 frequently used in parasitology laboratories in developing countries (3).

161 As for parasite recovery, concentration techniques were more efficient than the  
162 direct wet smear for identifying protozoan cysts and helminth ova, this performance  
163 being the reason why the use of these techniques is mandatory in routine stool  
164 examinations. On the other side, we mainly rely on the direct wet smear for diagnosing  
165 *Blastocystis sp.* and *Dientamoeba fragilis*, too fragile to be observed after performing a  
166 concentration method. Our results match those obtained by Oguoma *et al.* (3), the  
167 prevalence of helminth and protozoa detected by a formol-ether concentration  
168 technique being significantly higher than the one found by the direct smear.

169 The comparison of sensitivity between the concentration techniques included in this  
170 study showed a statistically highly significant difference in favour of the biphasic  
171 methods. Even though Ritchie's method recovered slightly more parasites than  
172 Bailenger's, the difference was not statistically significant. On the microscopic level, the  
173 comparative analysis did also highlight more abundant and better conserved parasites  
174 when using the biphasic techniques compared to the flotation method. The latter may  
175 therefore fail to diagnose intestinal parasites because of their limited number in the  
176 sample or due to an altered morphology that would render them unrecognisable. In  
177 agreement with our work, Bartlett *et al.* (7) drew the conclusion that the formalin-ether  
178 concentration method was more efficient than the modified zinc sulfate flotation  
179 technique it was compared to.

180 This study did also demonstrate a distinctive superiority of biphasic techniques over  
181 Willis' method for routine stool examination, since the latter proved to be more  
182 expensive and more time-consuming. These criteria, along with sensitivity, are  
183 important to take into consideration when picking the concentration technique to  
184 perform on a daily basis in the laboratory. On a larger scale, the need for simple and  
185 cheap yet efficient concentration techniques is crucial in developing countries — which  
186 also happen to be endemic for numerous intestinal parasites — in order to adapt to the  
187 cost containment policies in public health.

188 However, Bailenger's and Ritchie's techniques resort to hazardous reagents in their  
189 procedure. In fact, ether, employed by both above-mentioned methods, is flammable  
190 and irritating to skin, eyes and upper respiratory system (8). Symptoms induced by  
191 acetic acid, used as a fixative by the Bailenger method, vary from conjunctivitis and  
192 throat irritation to skin and eye burns (9). Ritchie's technique relies on formalin, another  
193 irritating reagent and a potential carcinogen after chronic exposure (10). No reagent  
194 employed by the Willis method has any kind of chemical hazards that may endanger the  
195 laboratory staff. Some authors demonstrated that less toxic reagents could be used in  
196 replacement of ether as a solvent to extract fat and debris, like ethyl acetate (11),  
197 acetone (12), or tween (13). A modified version of Ritchie's method by Régis Anécimo  
198 (14) did even replace both formaldehyde and ether by a natural detergent, yet had  
199 similar qualitative and quantitative performances in parasite recovery. Some protocols  
200 resort to sodium hydroxide (NaOH) to perform the formol-ether concentration  
201 technique, but a comparative study conducted by Suwansaksri et al. (15) found no

202 statistically significant difference when comparing its detection rate with a normal saline  
203 preparation, allowing to avoid the use of NaOH for security reasons. Laboratory  
204 technicians should therefore be aware of the health implications the use of biphasic  
205 techniques exposes to in order to strictly comply with the appropriate biosafety  
206 measures.

207

## 208 **CONCLUSIONS**

209 Biphasic techniques proved their superiority over Willis' flotation technique as they  
210 happen to be uncostly, quick to perform, and highly sensitive for detecting intestinal  
211 parasites, whether it be protozoan cysts or helminth ova. Even though the hazardous  
212 reagents employed may raise legitimate concerns over their health implications, these  
213 techniques ensure a reliable diagnosis for routine laboratory analysis.

214 In the absence of any international or national recommendation, conducting  
215 comparative studies between concentration techniques would be interesting for any  
216 laboratory in order to evaluate the affordable methods based on objective criteria,  
217 leading to the implementation of the fittest technique in the daily routine protocols.  
218 Charles Nicolle Teaching Hospital's parasitology and mycology laboratory proceeded this  
219 way before picking Ritchie's method, whose qualities were demonstrated by the present  
220 study, among others (16).

221 In the light of health issues that such techniques give rise to, further inquiries should  
222 look for safer intestinal parasite concentrators that would be at least as efficient.  
223 Evaluating commercial kits in comparison to in-home biphasic techniques would be  
224 valuable, particularly since the promotion of these alternatives focuses on biosafety  
225 guarantees.

226

## 227 **Acknowledgement**

228 This work forms part of the end of studies project of R. Guenichi and R. Hanchi, under  
229 the supervision of S. Trabelsi, MD, Professor of Medicine.

230 This research received no specific grant from any funding agency in the public,  
231 commercial, or not-for-profit sectors. The authors declare that they do not have any  
232 commercial associations which might give rise to a conflict of interest in connection with  
233 the submitted article.

234

## 235 **REFERENCES**

- 236 1. Haque R. 2007. Human Intestinal Parasites. *J Health Popul Nutr* 25(4):387–  
237 91.
- 238 2. Garcia L. 2007. Macroscopic and Microscopic Examination of Fecal Specimens,  
239 p 782-830. *In* Garcia L (ed), *Diagnostic Medical Parasitology*, 5th ed. ASM  
240 Press, Washington, DC.

- 241 3. Oguoma VM, Ekwunife CA. 2007. The Need For A Better Method: Comparison  
242 Of Direct Smear And Formol-Ether Concentration Techniques In Diagnosing  
243 Intestinal Parasites. *Internet J Trop Med*, vol 3, number 2.
- 244 4. Willis HH. 1921. A Simple Levitation Method for the Detection of Hookworm  
245 Ova. *Med J Aust* 2:375-76.
- 246 5. Ritchie LS. 1948. An ether sedimentation technique for routine stool  
247 examinations. *Bull US Army Med Dep* 8(4):326.
- 248 6. Bailanger J. 1965. Parasitological and functional coprology (in French).  
249 Imprimerie E. Drouillard, Bordeaux.
- 250 7. Bartlett MS, Harper K, Smith N, Verbanac P, Smith JW. 1978. Comparative  
251 evaluation of a modified zinc sulfate flotation technique. *J Clin Microbiol*  
252 7(6):524-8.
- 253 8. National Institute for Occupational Safety and Health. NIOSH Pocket Guide to  
254 Chemical Hazards. Third printing. 2007. Ethyl ether; p. 140.
- 255 9. National Institute for Occupational Safety and Health. NIOSH Pocket Guide to  
256 Chemical Hazards. Third printing. 2007. Acetic acid; p. 2.
- 257 10. National Institute for Occupational Safety and Health. NIOSH Pocket Guide to  
258 Chemical Hazards. Third printing. 2007. Formaldehyde; p. 148.
- 259 11. Truant AL, Elliott SH, Kelly MT, Smith JH. 1981. Comparison of formalin-ethyl  
260 ether sedimentation, formalin-ethyl acetate sedimentation, and zinc sulfate  
261 flotation techniques for detection of intestinal parasites. *J Clin Microbiol*  
262 13(5):882-84.

- 263 12. Feleke M, Yeshambel B, Moges T, Yenew K, Andargachew M, Afework K,  
264 Kabsay H. 2010. Comparison of formol-acetone concentration method with  
265 that of the direct iodine preparation and formol-ether concentration methods  
266 for examination of stool parasites. *Ethiop J Health Dev* 24(2):148-51.
- 267 13. Methanitikorn R, Sukontason K, Sukontason KL, Piangjai S. 2003. Evaluation  
268 of the formalin-Tween concentration technique for parasitic detection. *Rev*  
269 *Inst Med Trop Sao Paulo* 45(5):289-91
- 270 14. Anécimo RS, Tonani KAA, Fregonesi BM, Mariano AP, Ferrassino MDB,  
271 Trevilato TMB, Rodrigues RB, Segura-Muñoz SI. 2012. Adaptation of Ritchie's  
272 method for parasites diagnosing with minimization of chemical products.  
273 *Interdiscip Perspect Infect Dis* 2012:409757.
- 274 15. Suwansaksri J, Nithiuthai S, Wiwanitkit V, Soogarun S, Palatho P. 2002. The  
275 formol-ether concentration technique for intestinal parasites: comparing 0.1 N  
276 sodium hydroxide with normal saline preparations. *Southeast Asian J Trop*  
277 *Med Public Health* 33 Suppl 3:97-8.
- 278 16. Sato C, Rai SK, Uga S. 2014. Re-evaluation of the formalin-ether  
279 sedimentation method for the improvement of parasite egg recovery  
280 efficiency. *Nepal Med Coll J* 16(1):20-5

281

282

283 **TABLE 1** Positive samples according to the direct wet smear versus concentration  
 284 techniques (all techniques included)

|                          |                 | Direct wet smear |                 | Total      |
|--------------------------|-----------------|------------------|-----------------|------------|
|                          |                 | <i>Positive</i>  | <i>Negative</i> |            |
| Concentration techniques | <i>Positive</i> | 36               | 9               | <b>45</b>  |
|                          | <i>Negative</i> | 34               | 157             | <b>191</b> |
| <b>Total</b>             |                 | <b>70</b>        | <b>166</b>      | <b>236</b> |

285 **TABLE 2** Intestinal parasites identified by the direct wet smear versus recovered by  
 286 concentration techniques (all techniques included)

|                                                                            | Direct wet smear | Concentration techniques |
|----------------------------------------------------------------------------|------------------|--------------------------|
| <i>Blastocystis hominis</i>                                                | 54               | 2                        |
| <i>Dientamoeba fragilis</i>                                                | 5                | 0                        |
| <i>Giardia intestinalis</i> (cyst)                                         | 3                | 3                        |
| <i>Chilomastix mesnili</i> (cyst)                                          | 0                | 1                        |
| <i>Entamoeba coli</i> (cyst)                                               | 8                | 12                       |
| <i>Entamoeba histolytica/Entamoeba dispar/Entamoeba moshkovskii</i> (cyst) | 3                | 3                        |
| <i>Entamoeba hartmanni</i> (cyst)                                          | 2                | 12                       |

|                                     |    |    |
|-------------------------------------|----|----|
| <i>Endolimax nanus</i> (cyst)       | 14 | 27 |
| <i>Pseudolimax butschlii</i> (cyst) | 1  | 2  |
| <i>Ascaris lumbricoides</i> (ovum)  | 1  | 1  |
| Hookworms (ovum)                    | 0  | 2  |

287 **TABLE 3** Comparison between a flotation technique (Willis') and two biphasic  
 288 techniques (Ritchie's and Bailenger's) for the diagnosis of intestinal parasites in human  
 289 faecal samples

|                            |                         | <b>Flotation technique</b> |                         |
|----------------------------|-------------------------|----------------------------|-------------------------|
|                            |                         | <i>Positive samples</i>    | <i>Negative samples</i> |
| <b>Biphasic techniques</b> | <i>Positive samples</i> | 10                         | 34                      |
|                            | <i>Negative samples</i> | 1                          | 191                     |

290 **TABLE 4** Comparison between Ritchie's and Bailenger's concentration techniques for  
 291 the diagnosis of intestinal parasites in human faecal samples

|                              |                         | <b>Ritchie's technique</b> |                         |
|------------------------------|-------------------------|----------------------------|-------------------------|
|                              |                         | <i>Positive samples</i>    | <i>Negative samples</i> |
| <b>Bailenger's technique</b> | <i>Positive samples</i> | 42                         | 0                       |
|                              | <i>Negative samples</i> | 2                          | 192                     |

292 **TABLE 5** Number of positive human stool specimens per intestinal parasite according to  
 293 three different concentration techniques



| <b>Parasitic species</b>                                                                              | <b>Willis</b> | <b>Ritchie</b> | <b>Bailenger</b> |
|-------------------------------------------------------------------------------------------------------|---------------|----------------|------------------|
| <i>Entamoeba coli</i> (cyst)                                                                          | 2             | 12             | 12               |
| <i>Entamoeba histolytica</i> /<br><i>Entamoeba dispar</i> /<br><i>Entamoeba moshkovskii</i><br>(cyst) | 0             | 3              | 3                |
| <i>Entamoeba hartmanni</i> (cyst)                                                                     | 2             | 12             | 12               |
| <i>Endolimax nanus</i> (cyst)                                                                         | 3             | 27             | 25               |
| <i>Pseudolimax butschlii</i> (cyst)                                                                   | 1             | 2              | 2                |
| <i>Giardia intestinalis</i> (cyst)                                                                    | 2             | 3              | 3                |
| <i>Chilomastix mesnili</i> (cyst)                                                                     | 0             | 1              | 1                |
| <i>Ascaris lumbricoides</i> (ovum)                                                                    | 1             | 1              | 1                |
| Hookworms (ovum)                                                                                      | 2             | 2              | 2                |

294 **TABLE 6** Comparison of the abundance of parasites recovered between three  
295 concentration techniques

|              | <b>Willis</b> | <b>Bailenger</b> | <b>Ritchie</b> |
|--------------|---------------|------------------|----------------|
| <b>Cysts</b> | +             | ++               | +++            |
| <b>Eggs</b>  | +             | +++              | +++            |

296 +: a few parasitic elements; ++: moderately rich; +++: very rich

297 **TABLE 7** Comparison of the conservation of parasites recovered between three  
298 concentration techniques

|              | <b>Willis</b> | <b>Bailenger</b> | <b>Ritchie</b> |
|--------------|---------------|------------------|----------------|
| <b>Cysts</b> | —             | +                | +              |
| <b>Eggs</b>  | —             | +                | +              |

299 —: alteration; +: integral conservation

300 **TABLE 8** Cost in US dollars of reagents and material required by each of the three  
 301 studied techniques to concentrate 236 specimens (Tunisian market prices in November  
 302 2017)

|                             | <b>Willis</b> | <b>Bailenger</b> | <b>Ritchie</b> |
|-----------------------------|---------------|------------------|----------------|
| Sodium chloride             | 3.513         | -                | -              |
| Crystallized sodium acetate | -             | 1.573            | -              |
| Acetic acid                 | -             | 0.172            | -              |
| Formaldehyde                | -             | -                | 1.660          |
| Ether                       | -             | 21.365           | 10.682         |
| Gloves                      | 15.708        | 15.708           | 15.708         |
| Pasteur pipettes            | -             | 6.813            | 6.813          |

|                         |        |         |        |
|-------------------------|--------|---------|--------|
| Microscope slides       | 1.514  | 1.514   | 1.514  |
| 24- by 24-mm coverslip  | 2.366  | 2.366   | 2.366  |
| Conical tubes           | 12.112 | -       | 12.112 |
| Measuring tubes (50 ml) | 28.104 | 56.209  | 28.104 |
| Measuring tubes (15 ml) | 19.399 | -       | -      |
| Graduated pipettes      | -      | 0.734   | -      |
| pH paper                | -      | 0.191   | -      |
| Wooden sticks           | 0.237  | 0.237   | 0.473  |
| <b>Total</b>            | 82.953 | 106.882 | 79.432 |

303 **TABLE 9** Mean time needed *per* parasite concentration method

|                  | <b>Willis</b> | <b>Bailenger</b>        | <b>Ritchie</b>           |
|------------------|---------------|-------------------------|--------------------------|
| <b>Mean time</b> | 18 minutes    | 8 minutes and 5 seconds | 13 minutes and 4 seconds |

304
